# Supplementary material
Source: PubMed Central journal article supplement (PMC3883566)

## Supporting Information

### Plakinamine M, a Steroidal Alkaloid from the Marine Sponge

#### *Corticium* sp.

Zhenyu Lu,<sup>†</sup> Michael Koch,<sup>‡</sup> Mary Kay Harper,<sup>†</sup> Teatulohi K. Matainaho,<sup>§</sup> Louis R. Barrows,<sup>‡</sup>  
Ryan M. Van Wagoner,<sup>†</sup> and, Chris M. Ireland<sup>\*,†</sup>

<sup>†</sup>*Department of Medicinal Chemistry, University of Utah, Salt Lake City, Utah, 84112 and*

<sup>‡</sup>*Department of Pharmacology and Toxicology, University of Utah, Salt Lake City, Utah, 84112;*

<sup>§</sup>*Discipline of Pharmacology, School of Medicine and Health Sciences, University of Papua New Guinea, National Capital District, Papua New Guinea*

### List of Supporting Information

|                                                                                               |   |
|-----------------------------------------------------------------------------------------------|---|
| <b>Figure S1.</b> $^1\text{H}$ -NMR spectrum of <b>(1)</b> in $\text{CD}_3\text{OD}$ .....    | 3 |
| <b>Figure S2.</b> $^{13}\text{C}$ -NMR spectrum of <b>(1)</b> in $\text{CD}_3\text{OD}$ ..... | 4 |
| <b>Figure S3.</b> gCOSY spectrum of <b>(1)</b> in $\text{CD}_3\text{OD}$ .....                | 5 |
| <b>Figure S4.</b> gHMBC spectrum of <b>(1)</b> in $\text{CD}_3\text{OD}$ .....                | 6 |
| <b>Figure S5.</b> NOESY spectrum of <b>(1)</b> in $\text{CD}_3\text{OD}$ .....                | 7 |
| <b>Figure S6.</b> Corticium sp. collection (voucher PNG07-12-171).....                        | 8 |

**Figure S1.**  $^1\text{H}$ -NMR spectrum of (**1**) in  $\text{CD}_3\text{OD}$ .

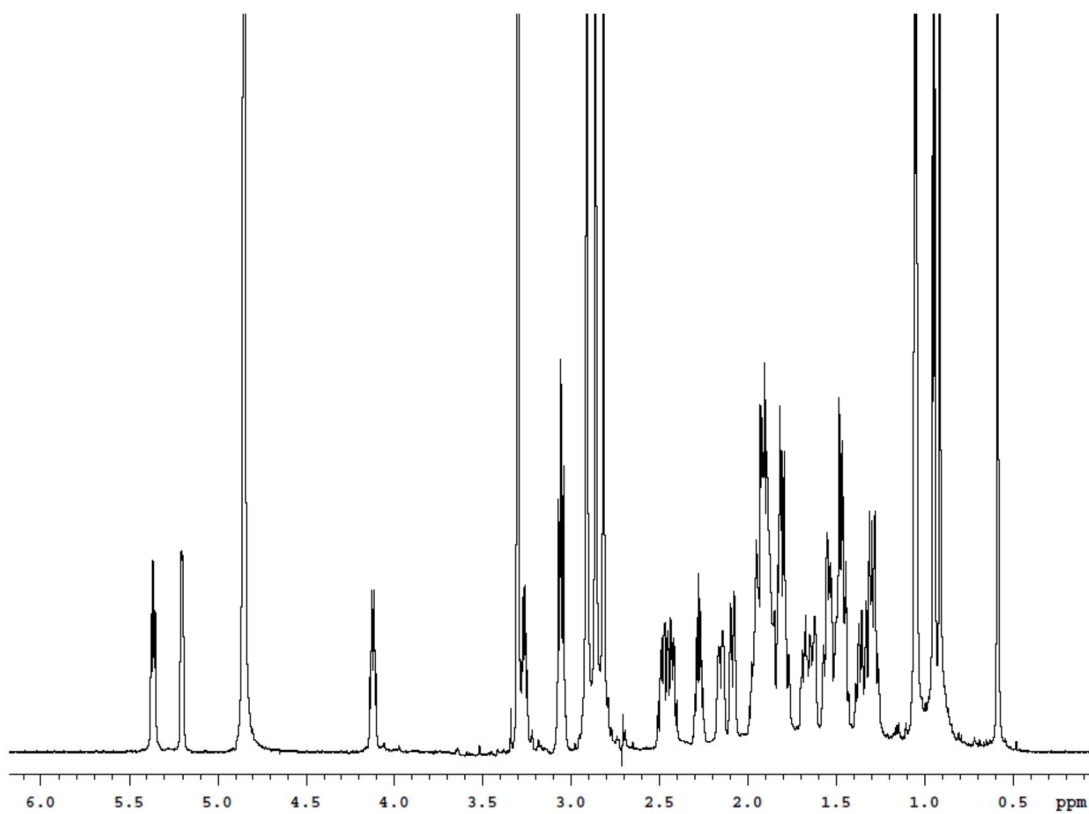

**Figure S2.**  $^{13}\text{C}$ -NMR spectrum of **(1)** in  $\text{CD}_3\text{OD}$

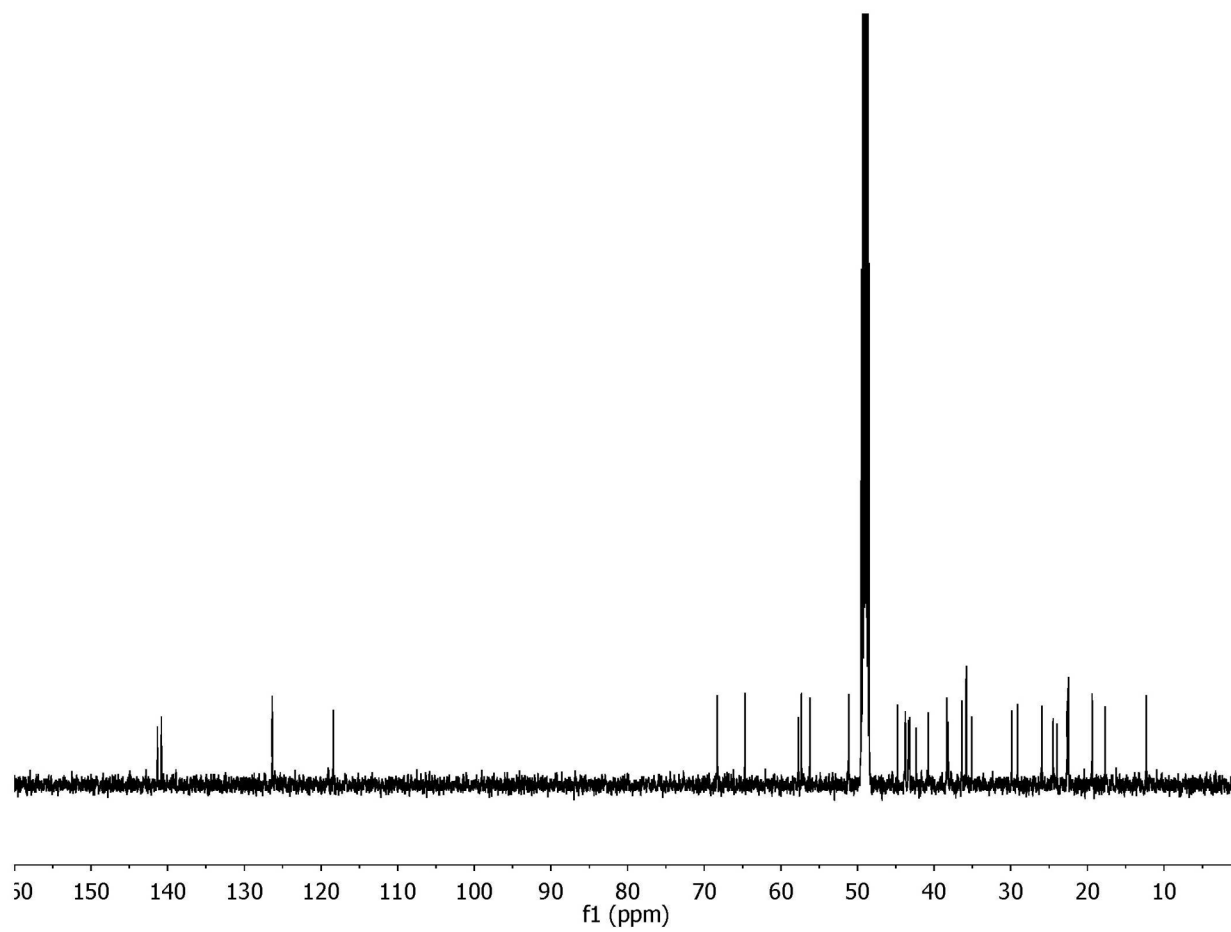

Figure S3. gCOSY spectrum of (1) in CD<sub>3</sub>OD.

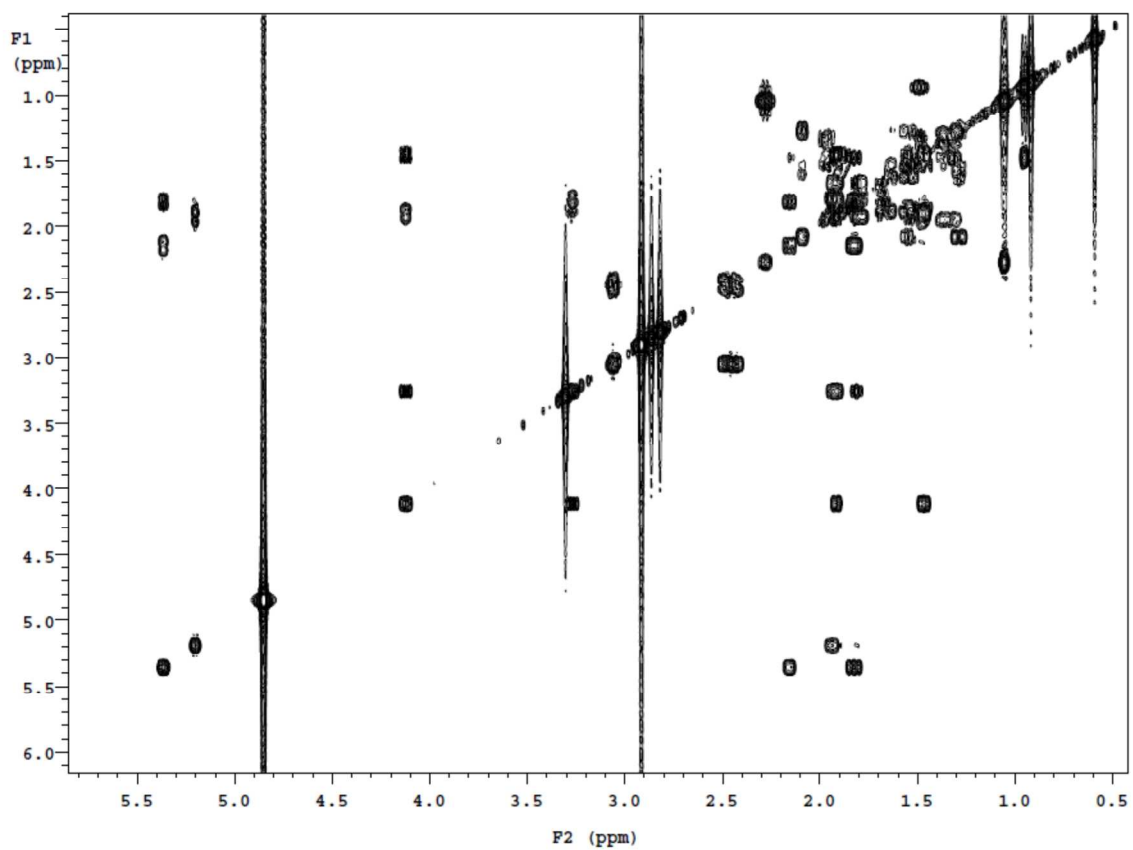

Figure S4. gHMBC spectrum of (1) in CD<sub>3</sub>OD.

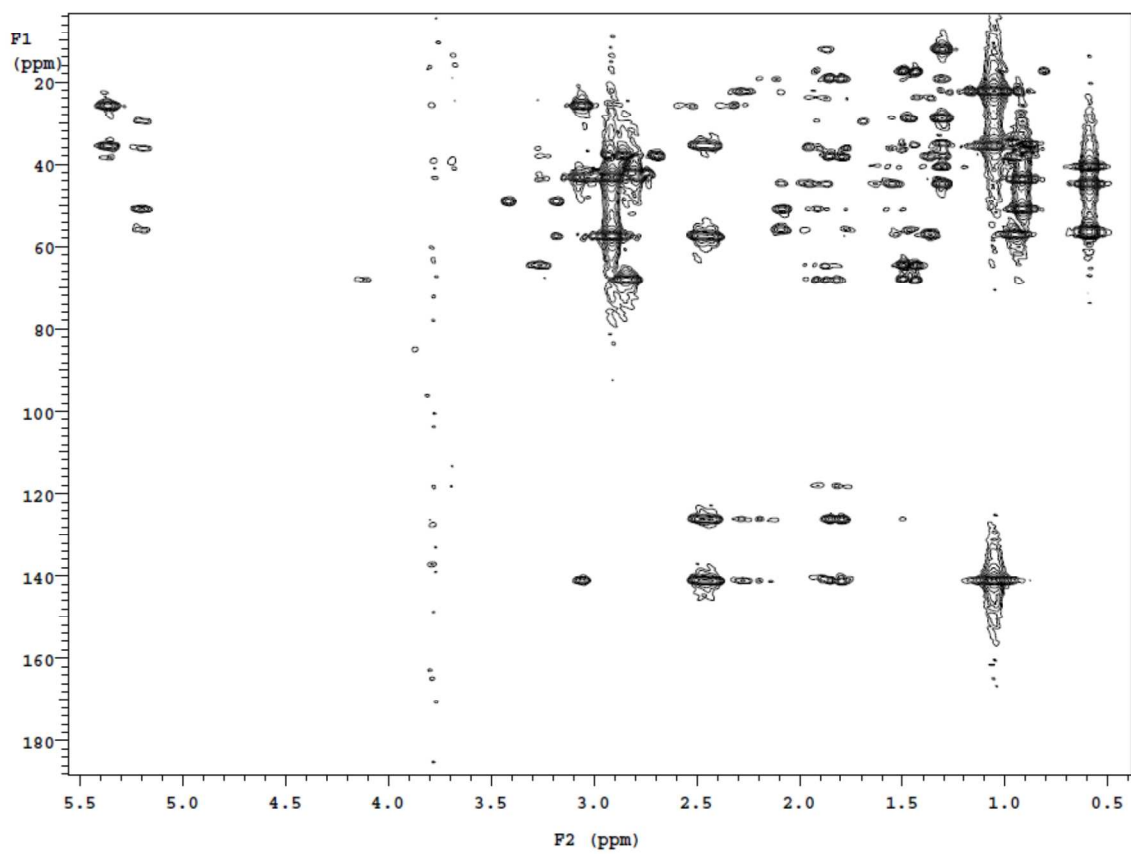

**Figure S5.** NOESY spectrum of (1) in CD<sub>3</sub>OD.

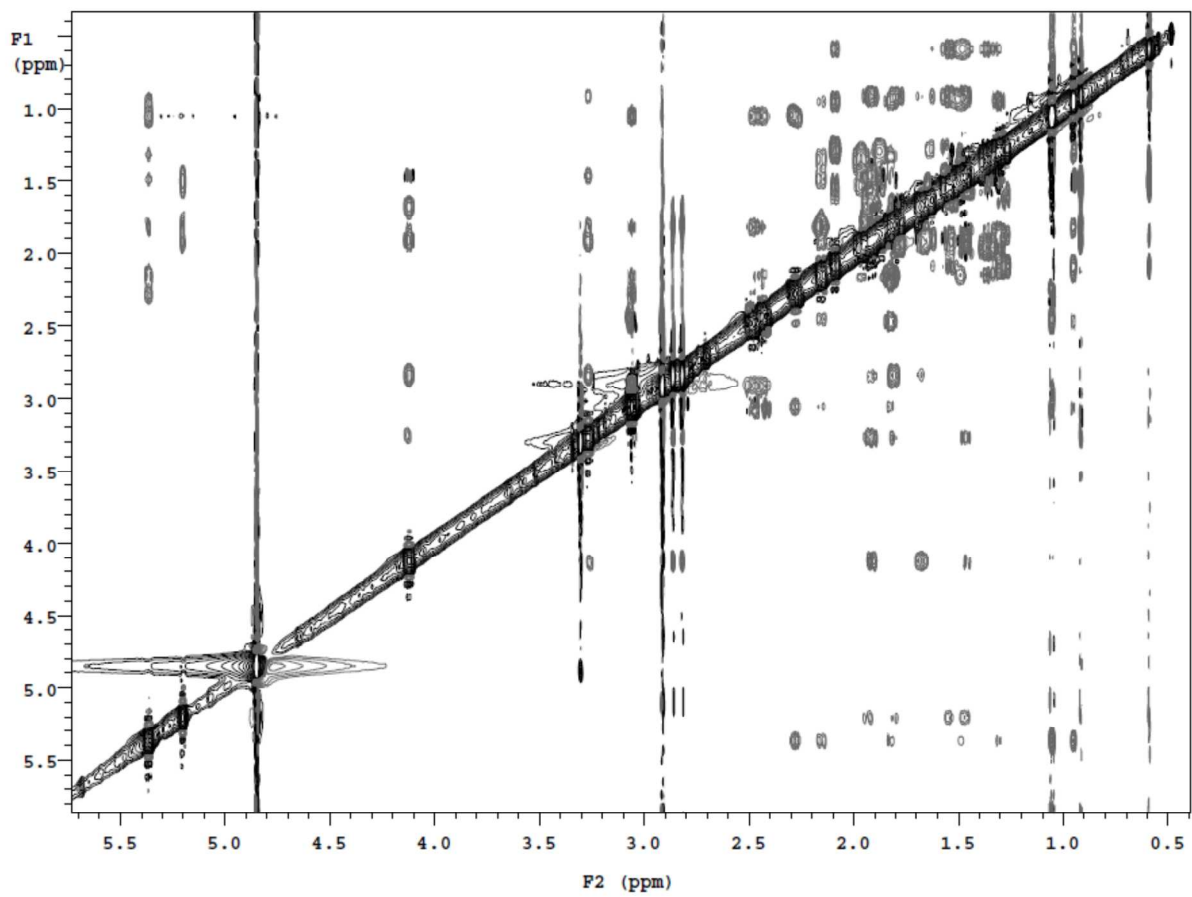

Figure S6. *Corticium* sp. collection (voucher PNG07-12-171)

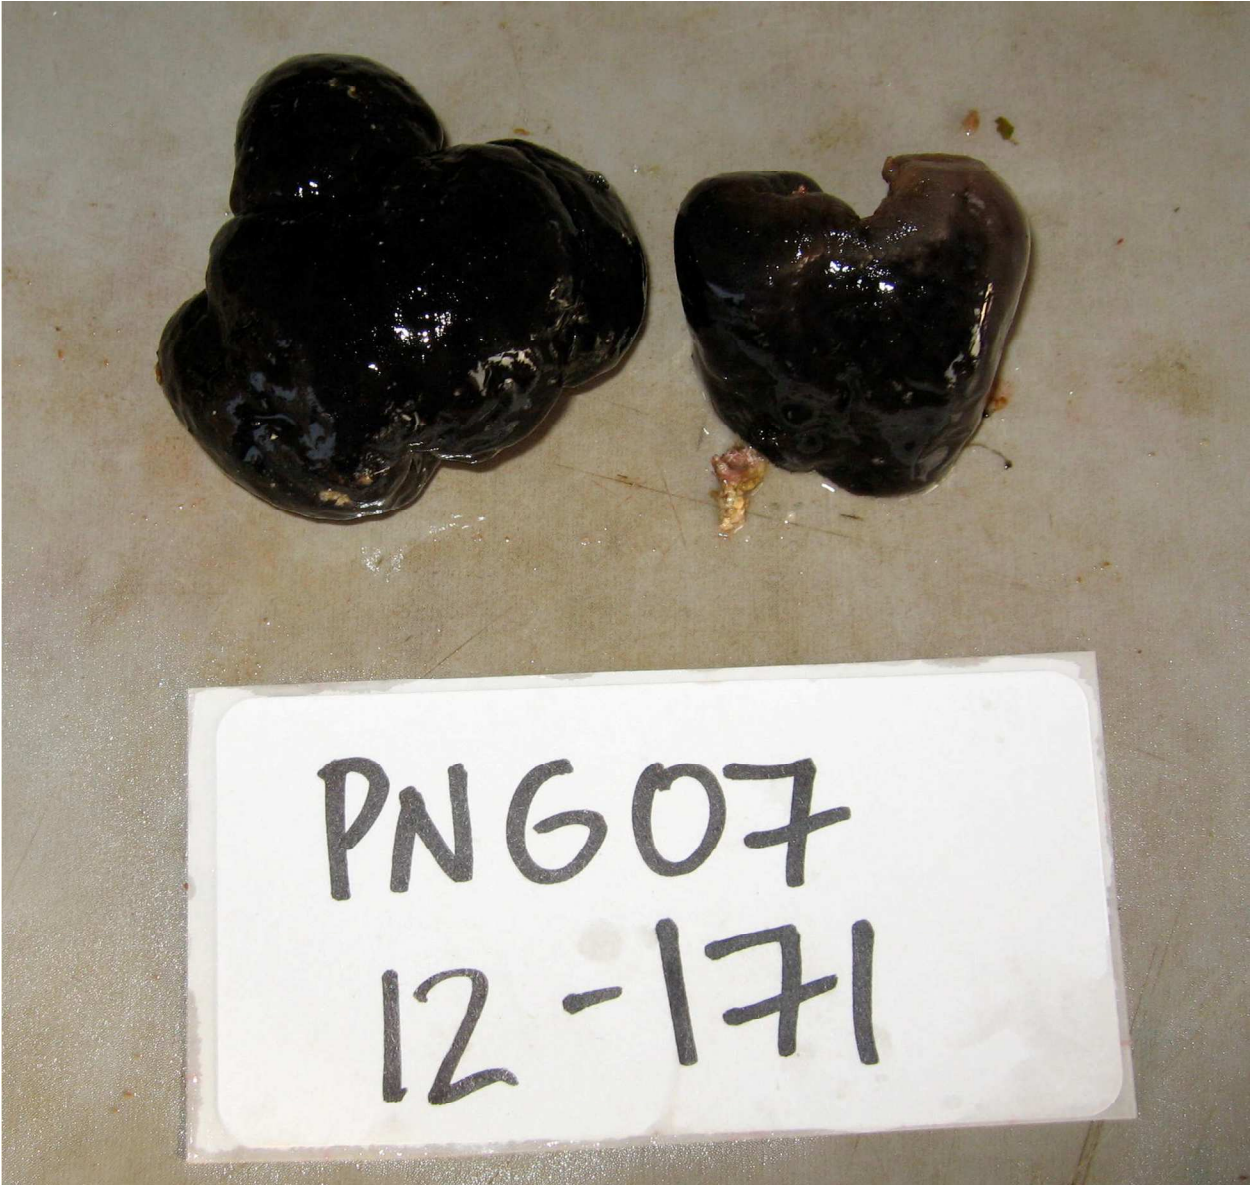

Supplement: NIHMS538806-supplement-1_si_001.pdf [file NIHMS538806-supplement-1_si_001.pdf]
